# Supplementary material for: Highly selective mercury(ii) cations detection in mixed–aqueous media by a ferrocene-based fluorescent receptor
Source: Royal Society of Chemistry journal article supplement (doi:10.1039/c2dt12156e), 2012-01-01
Supplement: c2dt12156e.pdf [file c2dt12156e.pdf]

## Supporting Information (SI)

# Highly selective mercury(II) cations detection in mixed/aqueous media by a ferrocene-based fluorescent receptor

María Alfonso,<sup>a</sup> Julia Contreras-García,<sup>b</sup> Arturo Espinosa,<sup>a</sup> Alberto Tárraga,<sup>a\*</sup> and Pedro Molina<sup>a\*</sup>

<sup>a</sup> *Departamento de Química Orgánica. Facultad de Química. Universidad de Murcia. Campus de Espinardo, E-30100 Murcia, Spain.*

*E-mail: [pmolina@um.es](mailto:pmolina@um.es); [atarraga@um.es](mailto:atarraga@um.es)*

<sup>b</sup> *Laboratoire de Chimie Théorique, Université Pierre et Marie Curie, 75005 Paris, France*

## Table of contents

|                                                                                                                                           |    |
|-------------------------------------------------------------------------------------------------------------------------------------------|----|
| <b>Figure S1.</b> <sup>1</sup> H NMR spectra of <b>3</b>                                                                                  | S3 |
| <b>Figure S2.</b> <sup>13</sup> C NMR spectra of <b>3</b>                                                                                 | S4 |
| <b>Figure S3.</b> Evolution of CV and OSWV of <b>3</b> in CH <sub>3</sub> CN.                                                             | S5 |
| <b>Figure S4.</b> Evolution of the CV of <b>3</b> in the presence of increasing amounts of Zn (OTf) <sub>2</sub> in CH <sub>3</sub> CN.   | S5 |
| <b>Figure S5.</b> Evolution of the OSWV of <b>3</b> in the presence of increasing amounts of Zn (OTf) <sub>2</sub> in CH <sub>3</sub> CN. | S6 |
| <b>Figure S6.</b> Evolution of the LSW of <b>3</b> in the presence of increasing amounts of Cu (OTf) <sub>2</sub> in CH <sub>3</sub> CN.  | S6 |
| <b>Figure S7.</b> Changes in the absorption spectra of <b>3</b> upon addition of Cu(OTf) <sub>2</sub> in CH <sub>3</sub> CN.              | S7 |
| <b>Figure S8.</b> Evolution of the LSW of <b>3</b> in the presence of increasing amounts of Zn (OTf) <sub>2</sub> in CH <sub>3</sub> CN.  | S7 |
| <b>Figure S9.</b> Evolution of the LSW of <b>3</b> in the presence of increasing amounts of Hg (OTf) <sub>2</sub> in CH <sub>3</sub> CN.  | S8 |

|                                                                                                                                                                                                                                        |     |
|----------------------------------------------------------------------------------------------------------------------------------------------------------------------------------------------------------------------------------------|-----|
| <b>Figure S10.</b> Changes in the absorption spectra of <b>3</b> upon addition of Hg(OTf) <sub>2</sub> in CH <sub>3</sub> CN.                                                                                                          | S8  |
| <b>Figure S11.</b> Changes in the absorption spectra of <b>3</b> upon addition of Zn(OTf) <sub>2</sub> in CH <sub>3</sub> CN.                                                                                                          | S9  |
| <b>Figure S12.</b> Job's plot for <b>3</b> and Hg(OTf) <sub>2</sub> in CH <sub>3</sub> CN.                                                                                                                                             | S9  |
| <b>Figure S13.</b> Titration profile showing the absorbance change as a function of the equivalents of Zn(OTf) <sub>2</sub> added.                                                                                                     | 9   |
| <b>Figure S14.</b> Changes in the fluorescence emission of <b>3</b> upon addition of Zn(OTf) <sub>2</sub> in CH <sub>3</sub> CN.                                                                                                       | S10 |
| <b>Figure S15.</b> Changes in the fluorescence emission of <b>3</b> upon addition of Pb(ClO <sub>4</sub> ) <sub>2</sub> in CH <sub>3</sub> CN.                                                                                         | S10 |
| <b>Figure S16.</b> Changes in the fluorescence emission of <b>3</b> upon addition of Hg(OTf) <sub>2</sub> in CH <sub>3</sub> CN.                                                                                                       | S11 |
| <b>Figure S17.</b> Visual changes observed in the fluorescence of <b>3</b> after addition of several cations in CH <sub>3</sub> CN.                                                                                                    | S11 |
| <b>Figure S18.</b> Fluorescence intensity of ligand <b>3</b> in CH <sub>3</sub> CN/EtOH (7/3) after addition of several cations.                                                                                                       | S11 |
| <b>Figure S19.</b> Changes in the fluorescence emission of <b>3</b> upon addition of Hg(OTf) <sub>2</sub> in CH <sub>3</sub> CN/EtOH (7/3) and visual features.                                                                        | S12 |
| <b>Figure S20.</b> Semilogarithmic plot for determining the detection limit of <b>3</b> towards Hg(OTf) <sub>2</sub> in CH <sub>3</sub> CN/EtOH (7/3).                                                                                 | S12 |
| <b>Figure S21.</b> Semilogarithmic plot for determining the detection limit of <b>3</b> towards Hg(OTf) <sub>2</sub> in CH <sub>3</sub> CN/EtOH/H <sub>2</sub> O (65/25/10).                                                           | S13 |
| <b>Figure S22.</b> ESI-MS spectra of an acetonitrile/ethanol solution of an equimolar amount of Hg(OTf) <sub>2</sub> and ligand <b>3</b>                                                                                               | S13 |
| <b>Figure S23.</b> Relative abundance of the isotopic cluster of the complex for <b>3</b> · with Hg(OTf) <sub>2</sub>                                                                                                                  | S14 |
| <b>Figure S24.</b> Reversibility of the titration experiments for compound <b>3</b> .                                                                                                                                                  | S14 |
| <b>Figure S25.</b> Fluorescence intensity of ligands <b>3</b> in CH <sub>3</sub> CN/EtOH (7/3) upon addition of 0.5 equiv of Hg(OTf) <sub>2</sub> in the presence of 1 equiv of interference metal ions.                               | S15 |
| <b>Figure S26.</b> Fluorescence intensity of ligands <b>3</b> in CH <sub>3</sub> CN/EtOH/H <sub>2</sub> O (65/25/10) upon addition of 0.5 equiv of Hg(OTf) <sub>2</sub> in the presence of 1 equiv of several interference metal ions. | S15 |
| <b>Figure S27.</b> Calculated (vdw-RIJCOSX-B3LYP/def2-TZVP-ecp) structure for the most stable C <sub>2</sub> -symmetric [ <b>4</b> <sub>2</sub> ·Hg(TfO) <sub>2</sub> ] model complex                                                  | S16 |
| <b>Figures S28-S29.</b> Side and front views for NCI isosurfaces of calculated structure for the most stable C <sub>2</sub> -symmetric [ <b>4</b> <sub>2</sub> ·Hg(TfO) <sub>2</sub> ] model complex                                   | S17 |
| <b>Calculated structures.</b> Cartesian coordinates (in Å) and energies for all computed species.                                                                                                                                      | S18 |

2-Ferrocenyl-3H-imidazo[4,5-h]phenanthro[4,5-abc]phenazine (3):

$^1\text{H}$  NMR (400 MHz, DMF- $d_7$ )

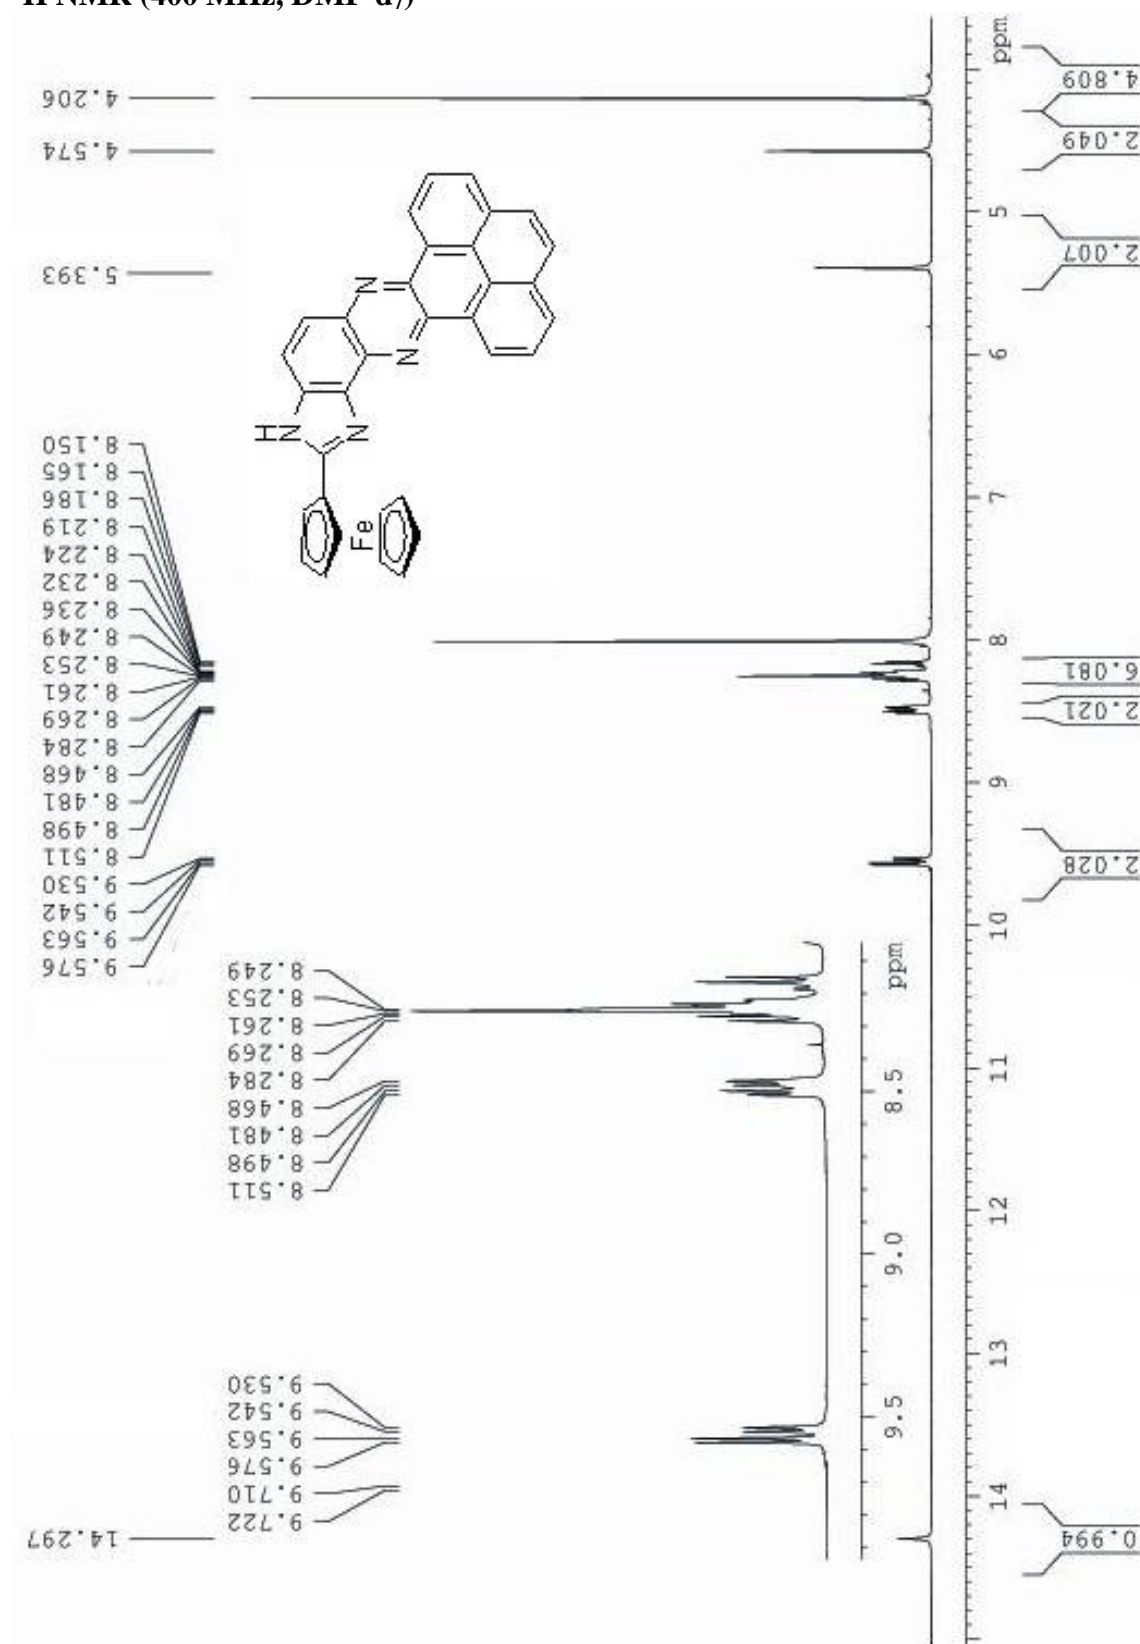

Figure S1.  $^1\text{H}$  NMR spectra of 3.

$^{13}\text{C}$  NMR (100 MHz, DMF- $d_7$ )

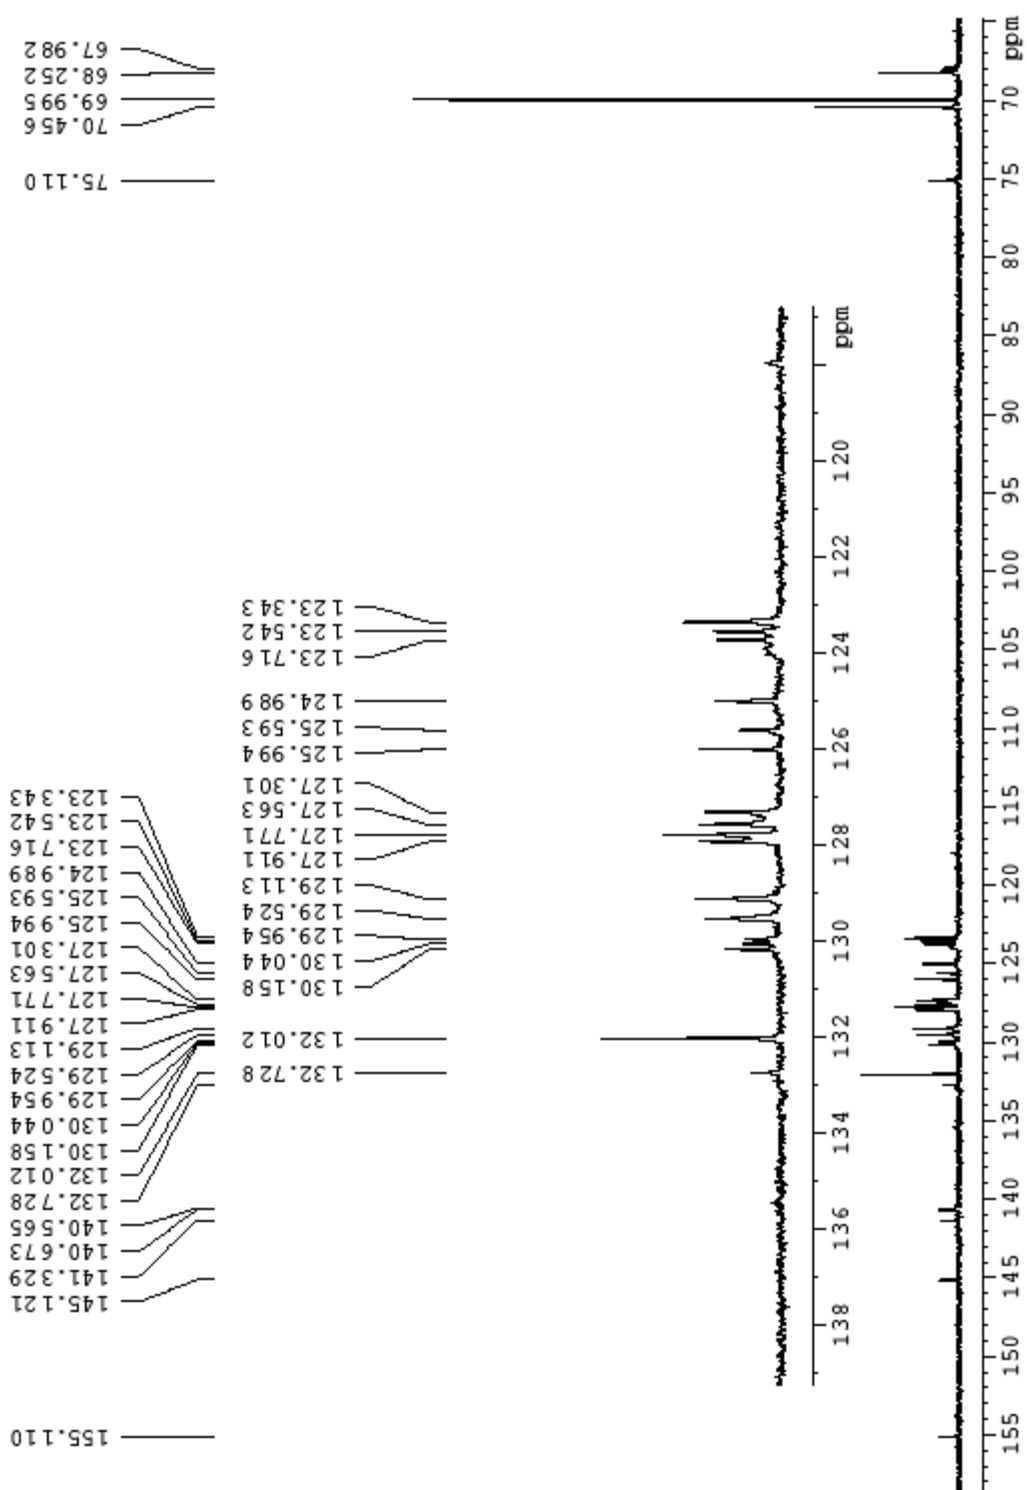

Figure S2.  $^{13}\text{C}$  NMR spectra of 3.

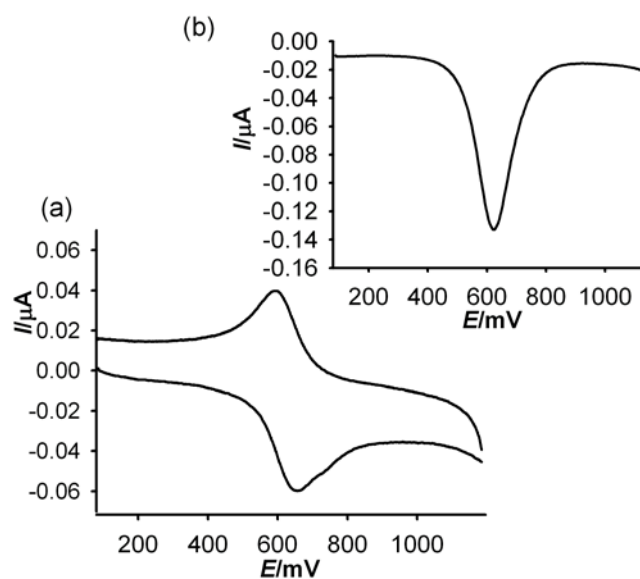

**Figure S3.** CV (a) and OSWV (b) of **3** ( $1 \times 10^{-4}$  M) in  $\text{CH}_3\text{CN}$  using  $[(n\text{-Bu})_4\text{N}]\text{PF}_6$  as supporting electrolyte.

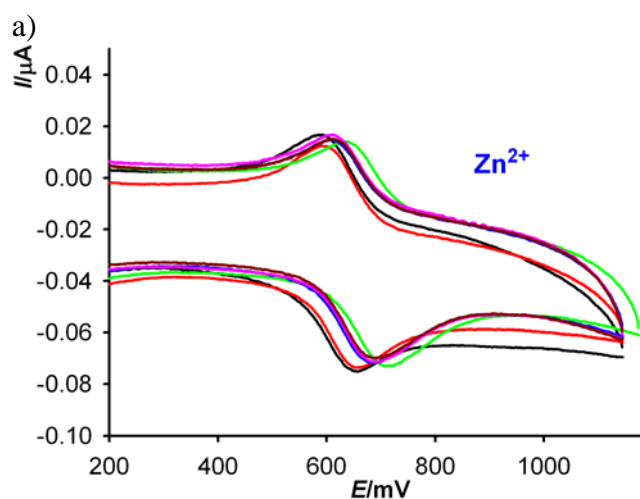

**Figure S4.** Evolution of the CV of **3** ( $1 \times 10^{-4}$  M) in  $\text{CH}_3\text{CN}$  in the presence of increasing amounts of  $\text{Zn}(\text{OTf})_2$  using  $[(n\text{-Bu})_4\text{N}]\text{PF}_6$  as supporting electrolyte.

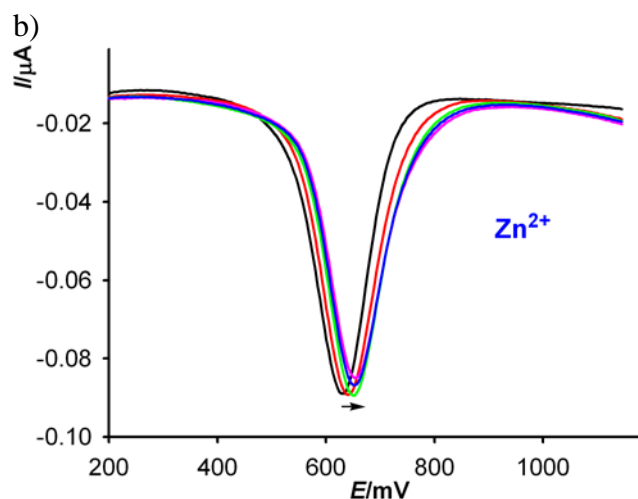

**Figure S5.** Evolution of the OSWC of **3** ( $1 \times 10^{-4}$  M) in  $\text{CH}_3\text{CN}$  in the presence of increasing amounts of  $\text{Zn}(\text{OTf})_2$  using  $[(n\text{-Bu})_4\text{N}]\text{PF}_6$  as supporting electrolyte.

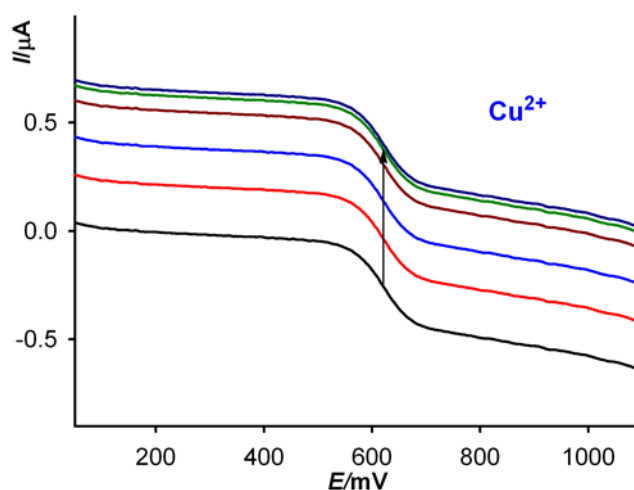

**Figure S6.** Evolution of the LSW of **3** ( $1 \times 10^{-4}$  M) in  $\text{CH}_3\text{CN}$  in the presence of increasing amounts of  $\text{Cu}(\text{OTf})_2$  obtained by using a rotating disk electrode at  $100 \text{ mVs}^{-1}$  and 1000 rpm and  $[(n\text{-Bu})_4\text{N}]\text{PF}_6$  0.1 M as supporting electrolyte.

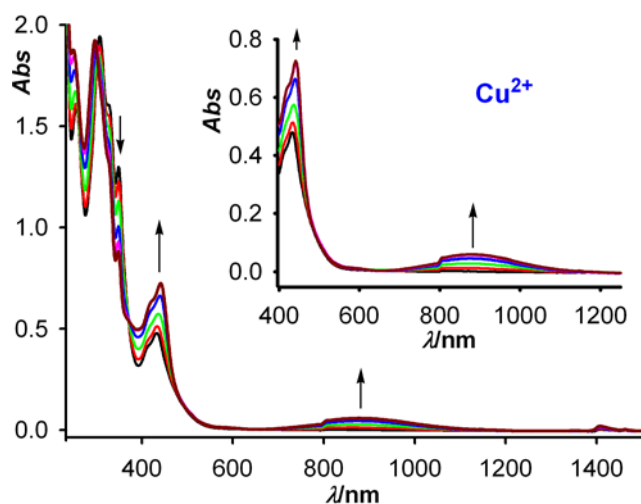

**Figure S7.** Changes in the absorption spectra of **3** ( $c = 5 \times 10^{-5}$  M in  $\text{CH}_3\text{CN}$ ) upon addition of increasing amounts of  $\text{Cu}(\text{OTf})_2$ , from 0 (black) to 1 equiv (deep red). Arrows indicate absorptions that increase or decrease during the experiment.

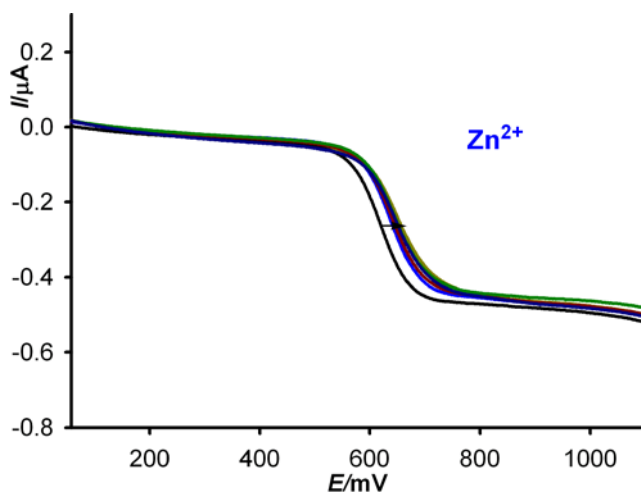

**Figure S8.** Evolution of the LSW of **3** ( $1 \times 10^{-4}$  M in  $\text{CH}_3\text{CN}$ ) in the presence of increasing amounts of  $\text{Zn}(\text{OTf})_2$  obtained by using a rotating disk electrode at  $100 \text{ mVs}^{-1}$  and 1000 rpm and  $[(n\text{-Bu})_4\text{N}]\text{PF}_6$  0.1 M as supporting electrolyte.

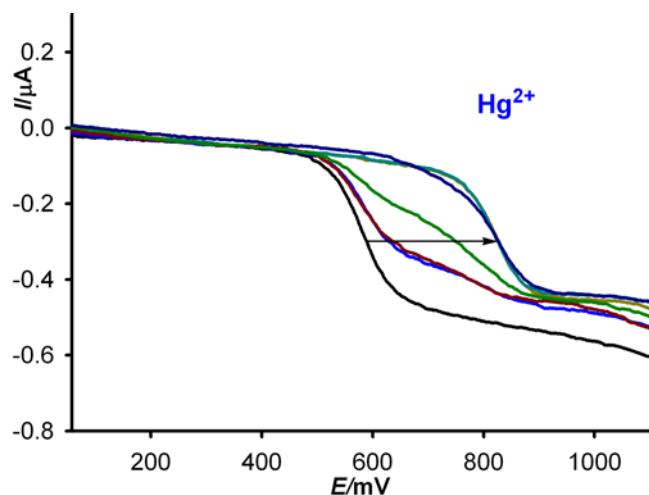

**Figure S9.** Evolution of the LSW of **3** ( $1 \times 10^{-4}$  M in  $\text{CH}_3\text{CN}$ ) in the presence of increasing amounts of  $\text{Hg}(\text{OTf})_2$  obtained by using a rotating disk electrode at  $100 \text{ mVs}^{-1}$  and 1000 rpm and  $[(n\text{-Bu})_4 \text{N}]\text{PF}_6$  0.1 M as supporting electrolyte.

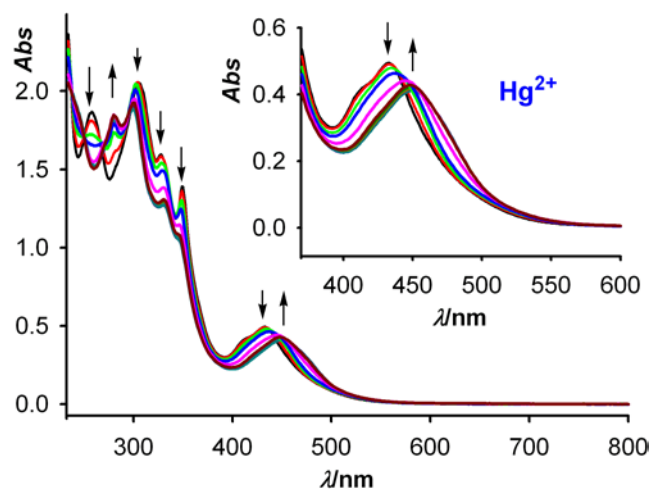

**Figure S10.** Changes in the absorption spectra of **3** ( $c = 5 \times 10^{-5}$  M in  $\text{CH}_3\text{CN}$ ) upon addition of increasing amounts of  $\text{Hg}(\text{OTf})_2$ , from 0 (black) to 0.5 equiv (deep red). Arrows indicate absorptions that increase or decrease during the experiment.



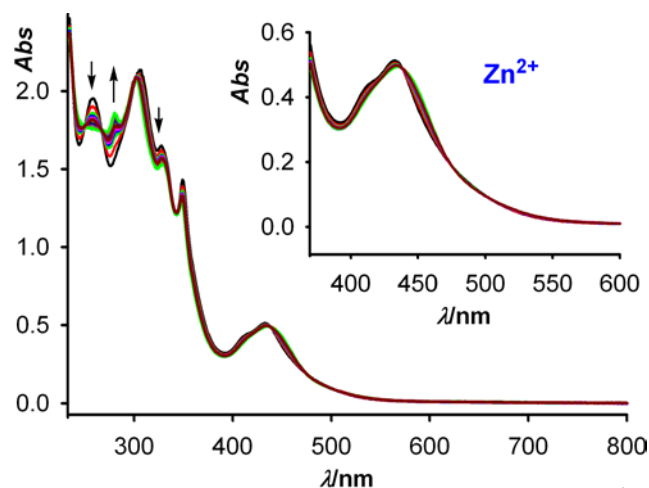

**Figure S11.** Changes in the absorption spectra of **3** ( $c = 5 \times 10^{-5}$  M in CH<sub>3</sub>CN) upon addition of increasing amounts of Zn(OTf)<sub>2</sub>, from 0 (black) to 1.0 equiv (deep red). Arrows indicate absorptions that increase or decrease during the experiment.

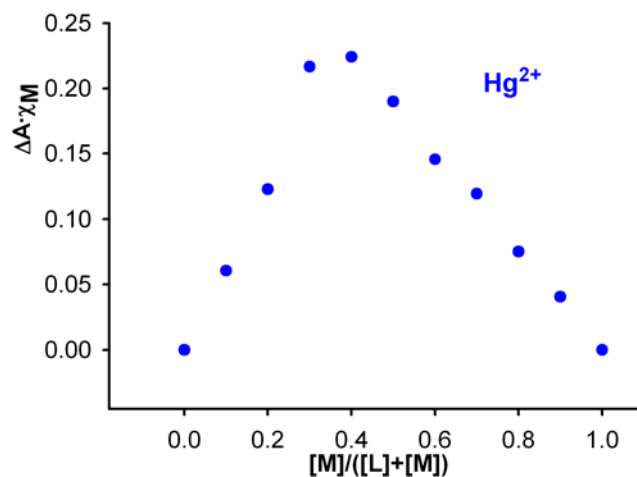

**Figure S12.** Job's plot for **3** [ $c = 1 \times 10^{-3}$  M in CH<sub>3</sub>CN] and Hg(OTf)<sub>2</sub> [0.1 mM in CH<sub>3</sub>CN], indicating the formation of a 2:1 complex.

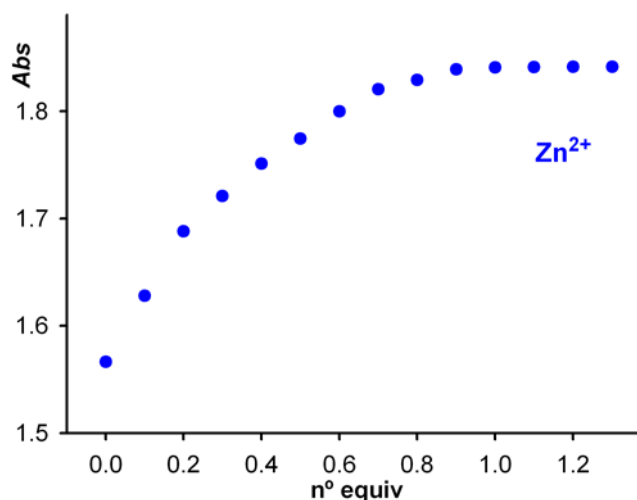

**Figure S113.** Titration profile showing the absorbance change as a function of the equivalents of Zn(OTf)<sub>2</sub> added.

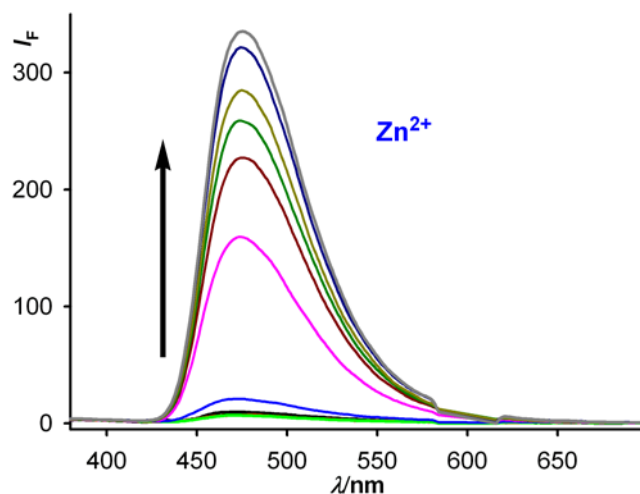

**Figure S14.** Changes in the fluorescence emission spectrum of **3** ( $c = 1 \times 10^{-5}$  M) in CH<sub>3</sub>CN upon titration with Zn(OTf)<sub>2</sub>: the initial (black) is that of **3** and the final one (deep gray), after addition of 1 equiv of Zn(OTf)<sub>2</sub> ( $c = 1 \times 10^{-2}$  M in CH<sub>3</sub>CN). Emission is monitored at  $\lambda_{\text{exc}} = 300$  nm.

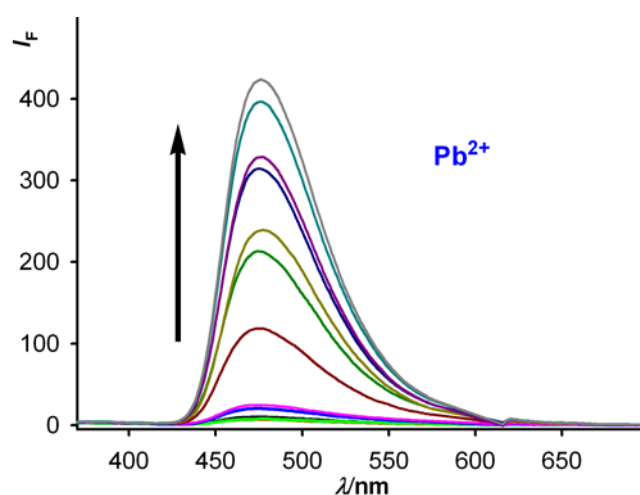

**Figure S15.** Changes in the fluorescence emission spectrum of **3** ( $c = 1 \times 10^{-5}$  M) in CH<sub>3</sub>CN upon titration with Pb(ClO<sub>4</sub>)<sub>2</sub>: the initial (black) is that of **3** and the final one (deep gray), after addition of 1 equiv of Pb(ClO<sub>4</sub>)<sub>2</sub> ( $c = 1 \times 10^{-2}$  M in CH<sub>3</sub>CN). Emission is monitored at  $\lambda_{\text{exc}} = 300$  nm.

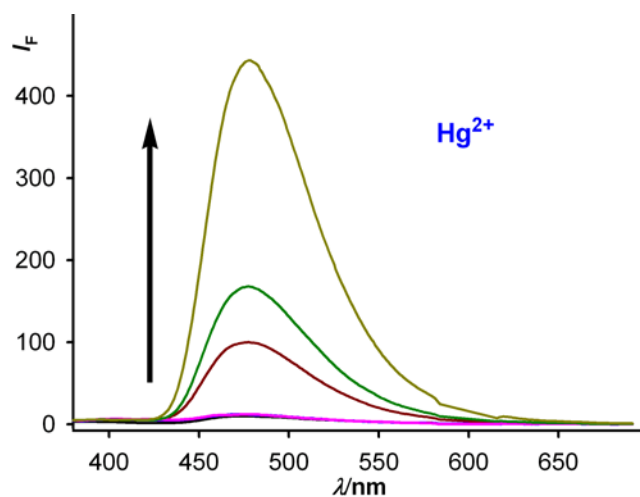

**Figure S16.** Changes in the fluorescence emission spectrum of **3** ( $c = 1 \times 10^{-5}$  M) in  $\text{CH}_3\text{CN}$  upon titration with  $\text{Hg}(\text{OTf})_2$ : the initial (black) is that of **3** and the final one (deep yellow), after addition of 0.5 equiv of  $\text{Hg}(\text{OTf})_2$  ( $c = 1 \times 10^{-2}$  M in  $\text{CH}_3\text{CN}$ ). Emission is monitored at  $\lambda_{\text{exc}} = 300$  nm.

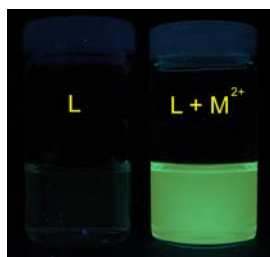

**Figure S17.** Visual changes observed in the fluorescence of  $\text{CH}_3\text{CN}$  solution of **3** (left) after addition of the cations (right).

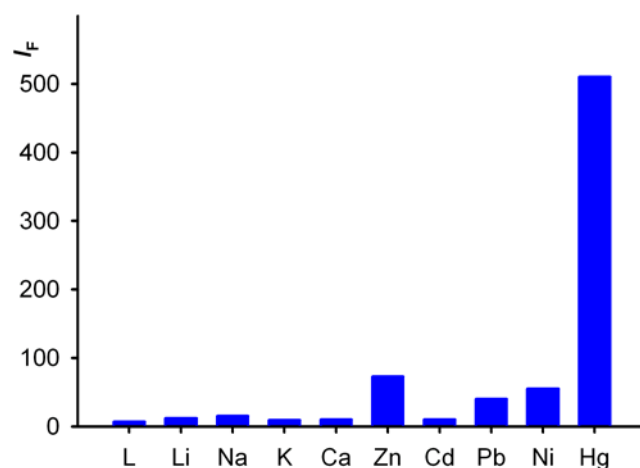

**Figure S18.** Fluorescence intensity of ligand **3** in  $\text{CH}_3\text{CN}/\text{EtOH}$  (70/30), after addition of 1 equiv. of several metal cations. Emission monitored at  $\lambda_{\text{exc}} = 300$  nm.

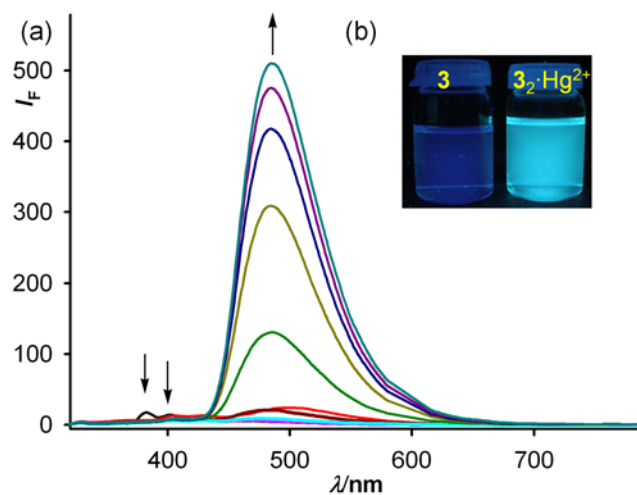

**Figure S19.** (a) Changes in the fluorescence emission spectrum of **3** ( $c = 1 \times 10^{-5}$  M in  $\text{CH}_3\text{CN}/\text{EtOH}$  (70/30)) upon titration with  $\text{Hg}(\text{OTf})_2$ : the initial (black) is that of **3** and the final one (deep cyan), after addition of 0.5 equiv. of  $\text{Hg}(\text{OTf})_2$  ( $c = 1 \times 10^{-2}$  M in  $\text{CH}_3\text{CN}$ ). Emission is monitored at  $\lambda_{\text{exc}} = 300$  nm. (b) Visual changes observed in the fluorescence of  $\text{CH}_3\text{CN}/\text{EtOH}$  (70/30) solutions of **3** (left) and after addition of  $\text{Hg}(\text{OTf})_2$  (right).

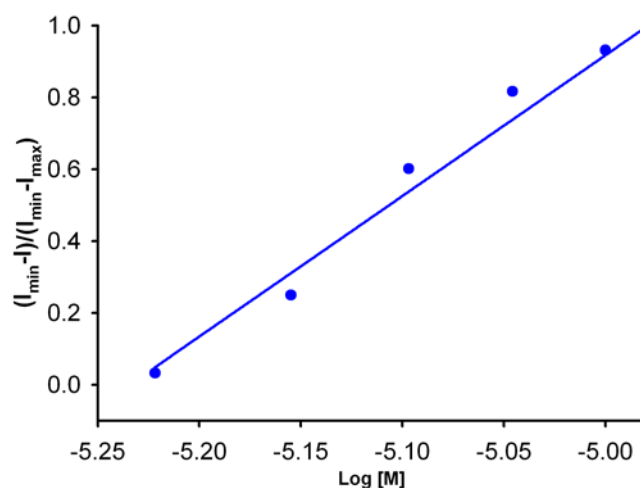

**Figure S20.** Fluorescence intensity of **3** ( $c = 1 \cdot 10^{-4}$  M in  $\text{CH}_3\text{CN}/\text{EtOH}$  (70/30)) at each concentration of  $\text{Hg}(\text{OTf})_2$  added, normalized between the minimum fluorescence intensity, found at zero equiv of metal cation, and the maximum fluorescence intensity, found at  $[\text{Hg}^{2+}] = 4.10$  ppm.

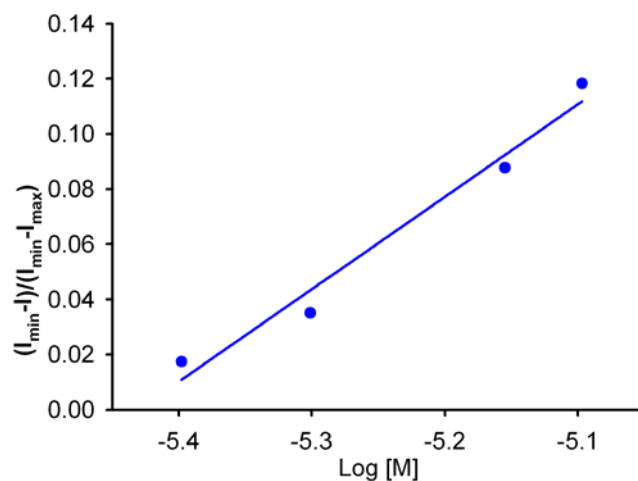

**Figure S21.** Fluorescence intensity of **3** ( $c = 1 \cdot 10^{-4}$  M in  $\text{CH}_3\text{CN}/\text{EtOH}/\text{H}_2\text{O}$  (65/25/10)) at each concentration of  $\text{Hg}(\text{OTf})_2$  added, normalized between the minimum fluorescence intensity, found at zero equiv of metal cation, and the maximum fluorescence intensity, found at  $[\text{Hg}^{2+}] = 1.52$  ppm.

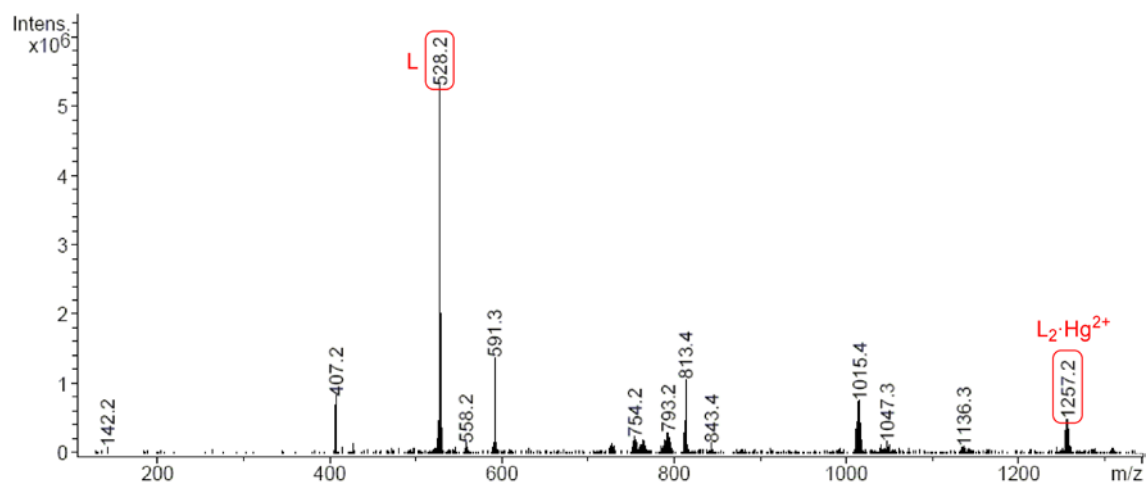

**Figure S22.** ESI-MS spectra of a  $\text{CH}_3\text{CN}/\text{EtOH}$  (70/30) solution of an equimolar amount of  $\text{Hg}(\text{OTf})_2$  and ligand **3**.

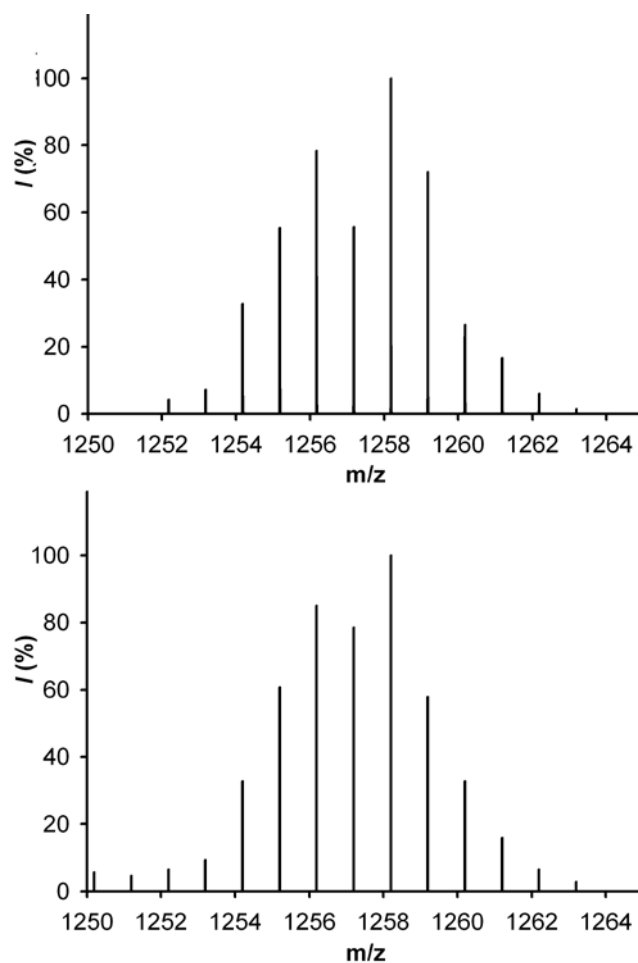

**Figure S23.** Relative abundance of the isotopic cluster for  $3_2 \cdot \text{Hg}^{2+}$  (top) simulated; (bottom) experimental.

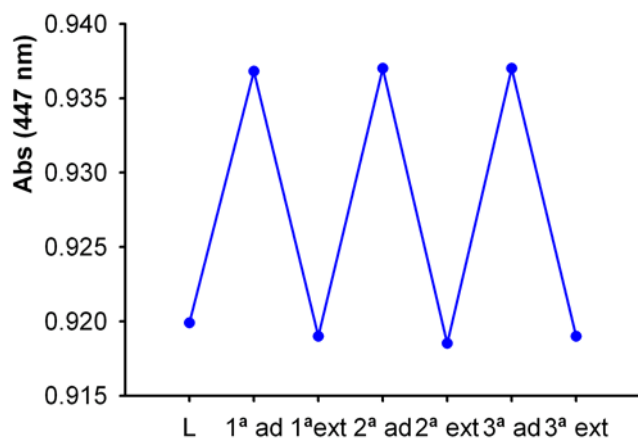

**Figure S24.** Stepwise complexation/decomplexation (extraction with  $\text{H}_2\text{O}$ ) cycles of ligand **3** ( $c = 1 \cdot 10^{-4} \text{M}$  in  $\text{CH}_2\text{Cl}_2$ ) in the presence of  $\text{Hg}(\text{OTf})_2$ , carried out by UV/Vis analysis.

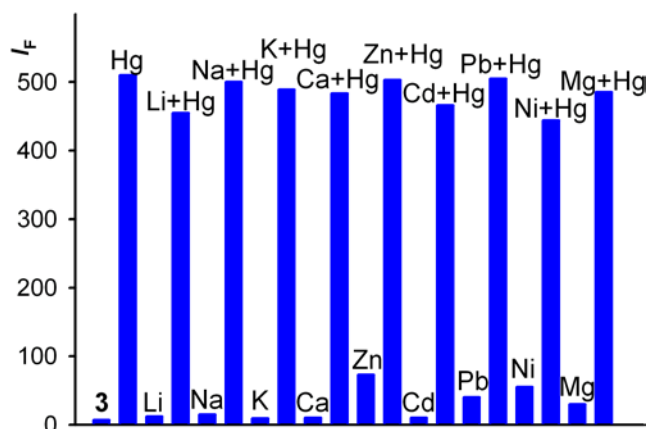

**Figure S25.** Fluorescence emission intensity of **3** upon addition of 0.5 equiv. of  $\text{Hg}(\text{OTf})_2$  in the presence of 1 equiv. of interference metal ions in  $\text{CH}_3\text{CN}/\text{EtOH}$  (7/3).

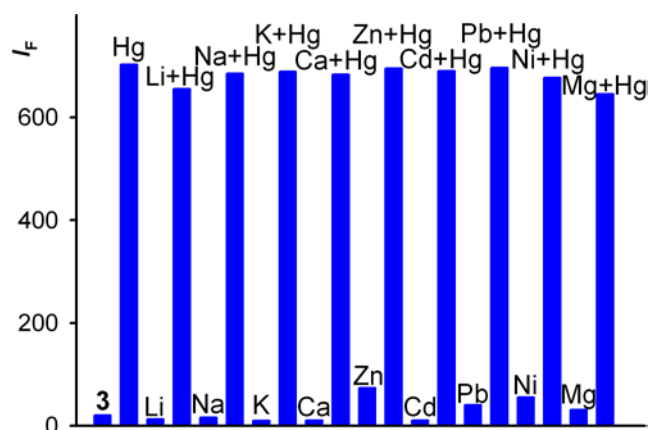

**Figure S26.** Fluorescence emission intensity of **3** upon addition of 0.5 equiv. of  $\text{Hg}(\text{OTf})_2$  in the presence of 1 equiv. of interference metal ions in  $\text{CH}_3\text{CN}/\text{EtOH}/\text{H}_2\text{O}$  (65/25/10).

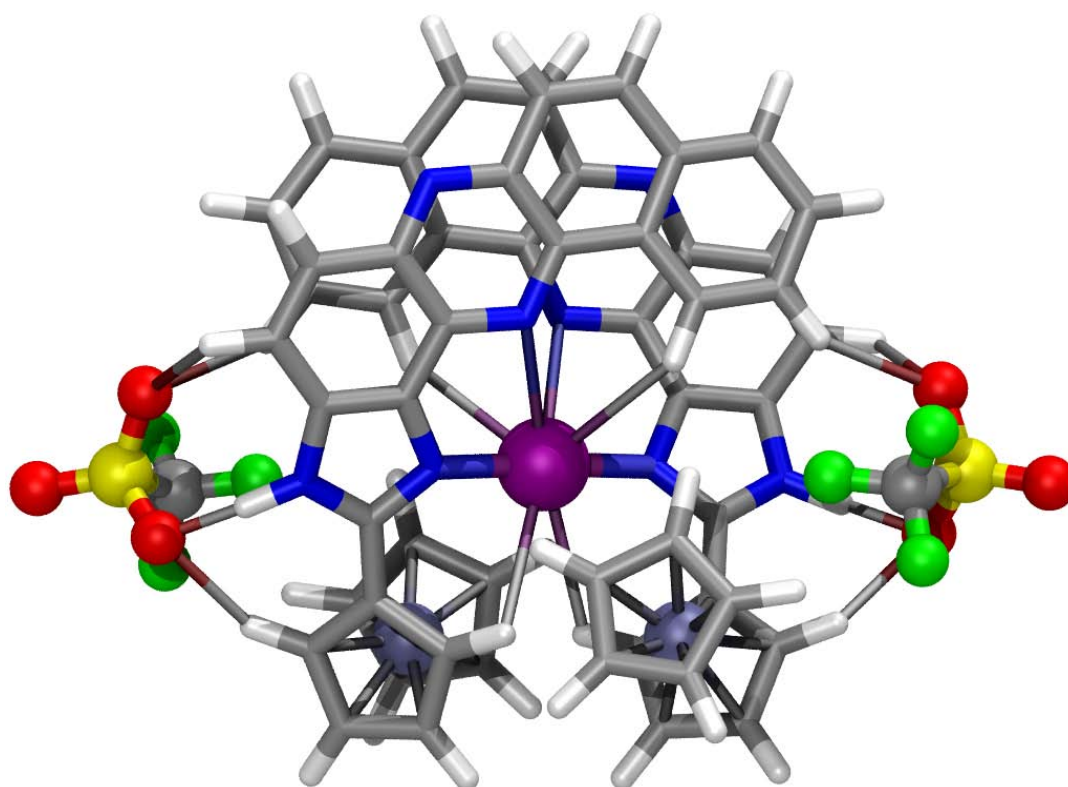

**Figure S27.** Calculated (vdw-RIJCOSX-B3LYP/def2-TZVP-ecp) structure for the most stable  $C_2$ -symmetric  $[4_2 \cdot \text{Hg}(\text{TfO})_2]$  model complex.



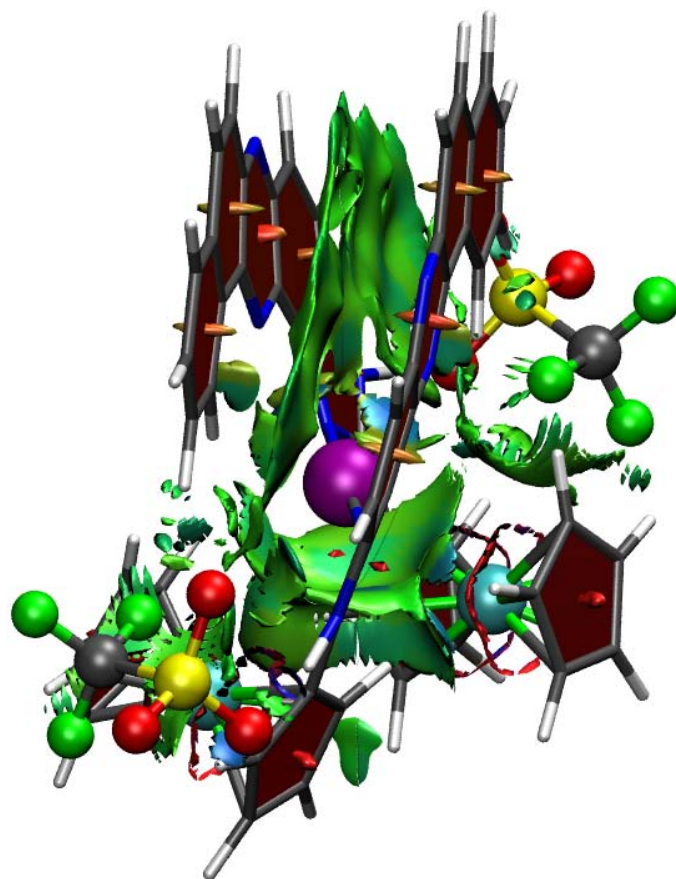

**Figure S28.** Side view for NCI isosurfaces in the calculated (vdw-RIJCOSX-B3LYP/def2-TZVP-ecp) structure for the most stable  $C_2$ -symmetric  $[4_2 \cdot \text{Hg}(\text{TfO})_2]$  model complex highlighting  $\pi$  stacking

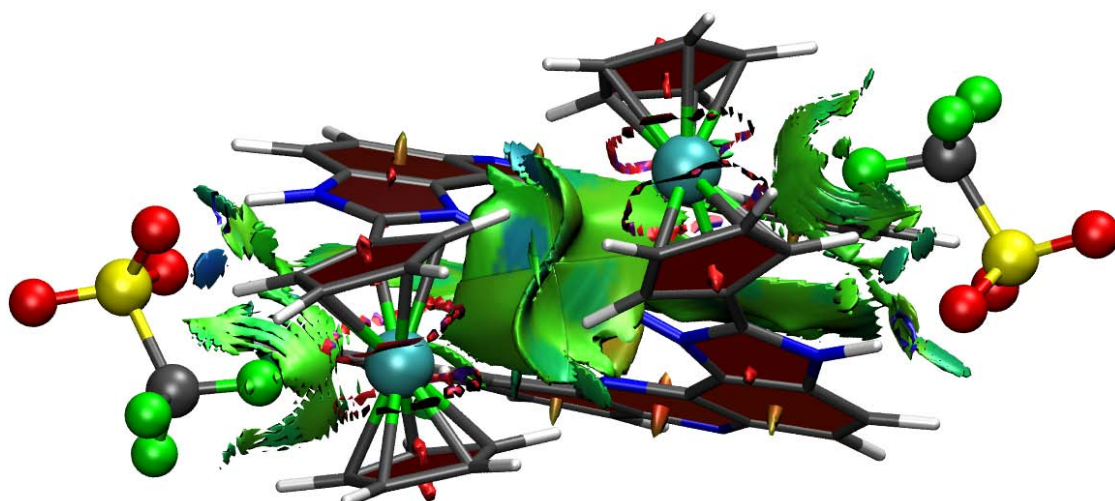

**Figure S29.** Front view for NCI isosurfaces in the calculated (vdw-RIJCOSX-B3LYP/def2-TZVP-ecp) structure for the most stable  $C_2$ -symmetric  $[4_2 \cdot \text{Hg}(\text{TfO})_2]$  model complex highlighting hydrogen bonds with lateral anions and ferrocene interpenetration.

**Calculated structures:** cartesian coordinates (in Å) and energies for all computed species.-

Complex  $4_2 \cdot \text{Hg}(\text{TfO})_2 \cdot (C_2)$

E = -7120.815314304 au

E = -7119.82311389 au (RIJCOSX-B3LYP/def2-TZVP-f)

|    |             |             |             |    |             |             |             |
|----|-------------|-------------|-------------|----|-------------|-------------|-------------|
| N  | 0.00000000  | 0.00000000  | 0.00000000  | N  | -4.15922451 | -4.45784411 | 1.06732625  |
| C  | 1.35141476  | 0.00000000  | 0.00000000  | C  | -4.65387109 | -3.51196268 | 1.93872138  |
| N  | 1.79873150  | 1.26068479  | 0.00000000  | C  | -3.67209301 | -2.54851913 | 2.04174649  |
| C  | 0.72303525  | 2.12092167  | 0.03957869  | H  | -4.68690163 | -5.27759089 | 0.67028660  |
| C  | -0.39869055 | 1.31843798  | 0.01773885  | C  | -3.85547005 | -1.36790571 | 2.78505622  |
| H  | 2.81184609  | 1.52210922  | 0.11543182  | C  | -5.14399194 | -1.19490187 | 3.38326358  |
| C  | -1.69871951 | 1.84395310  | 0.13496989  | C  | -6.12578312 | -2.23519196 | 3.29569755  |
| C  | -1.78987518 | 3.25777532  | 0.33712925  | C  | -5.90252336 | -3.38575296 | 2.59281837  |
| C  | -0.60842006 | 4.06842338  | 0.30886794  | H  | -7.07702379 | -2.05143487 | 3.77649794  |
| C  | 0.63808674  | 3.52854314  | 0.15911875  | H  | -6.66370263 | -4.14148389 | 2.46489906  |
| H  | -0.74127986 | 5.13153652  | 0.45696662  | N  | -2.88978418 | -0.44979276 | 2.85835693  |
| H  | 1.53631158  | 4.12665210  | 0.20753635  | C  | -3.18062263 | 0.69367125  | 3.47504640  |
| N  | -2.76427732 | 1.04070714  | 0.11960604  | C  | -4.50814488 | 0.91658415  | 3.99284115  |
| C  | -3.95028721 | 1.59582944  | 0.35965317  | N  | -5.44534249 | -0.03187997 | 3.96975851  |
| C  | -4.03986106 | 3.00277924  | 0.66393206  | C  | -2.18388085 | 1.73604469  | 3.59702292  |
| N  | -2.97702261 | 3.80673847  | 0.61412900  | C  | -0.84192166 | 1.54244355  | 3.22875580  |
| C  | -5.15226381 | 0.78950533  | 0.35673570  | C  | 0.07636882  | 2.56593294  | 3.33051228  |
| C  | -5.15685929 | -0.55505263 | -0.05081715 | C  | -0.32445275 | 3.82195424  | 3.80557999  |
| C  | -6.31422890 | -1.30356690 | -0.01388109 | C  | -1.63085115 | 4.02987952  | 4.19557947  |
| C  | -7.50854264 | -0.72495499 | 0.43640742  | C  | -2.57937293 | 2.99565645  | 4.11244760  |
| C  | -7.53463551 | 0.59967481  | 0.81940135  | C  | -3.92942977 | 3.19603708  | 4.55991521  |
| C  | -6.36861152 | 1.38373929  | 0.77635770  | C  | -4.84624056 | 2.20242765  | 4.52707233  |
| C  | -6.40242598 | 2.77500812  | 1.13168965  | H  | -0.53331332 | 0.57063755  | 2.87175258  |
| C  | -5.30133431 | 3.55666825  | 1.05762908  | H  | 1.10316811  | 2.41780684  | 3.03345192  |
| H  | -4.23703138 | -0.99612359 | -0.40644383 | H  | 0.40287307  | 4.62121508  | 3.86724092  |
| H  | -6.31108500 | -2.34002242 | -0.31430254 | H  | -1.94414826 | 4.99414551  | 4.57707815  |
| H  | -8.40711915 | -1.32725311 | 0.47409097  | H  | -4.19423481 | 4.17384290  | 4.94404358  |
| H  | -8.45746581 | 1.05713171  | 1.15499431  | H  | -5.85936628 | 2.34116594  | 4.87960370  |
| H  | -7.35013826 | 3.19177023  | 1.45095644  | C  | -2.13352748 | -4.82299317 | -0.27267282 |
| H  | -5.32394903 | 4.60917924  | 1.30594258  | C  | -2.57714299 | -5.79354678 | -1.22527529 |
| C  | 2.19694278  | -1.16200656 | -0.06613784 | C  | -1.42882922 | -6.31439930 | -1.87063505 |
| C  | 3.56204043  | -1.25128888 | 0.35190231  | C  | -0.27537498 | -5.67718887 | -1.33114213 |
| C  | 4.00941215  | -2.56570236 | 0.07158668  | C  | -0.70011970 | -4.75475042 | -0.34281401 |
| C  | 2.93688372  | -3.29598901 | -0.51485222 | H  | -3.60372377 | -6.05634102 | -1.42038588 |
| C  | 1.81311830  | -2.43741986 | -0.60487191 | H  | -1.43690708 | -7.03544339 | -2.67111298 |
| H  | 4.12900340  | -0.45986858 | 0.81364244  | H  | 0.74359243  | -5.84126714 | -1.63875186 |
| H  | 4.98433418  | -2.95666701 | 0.31118727  | H  | -0.05389946 | -4.15701386 | 0.27497606  |
| H  | 2.96037019  | -4.33088145 | -0.81198190 | Fe | -1.54215826 | -4.26475702 | -2.16989996 |
| H  | 0.86633737  | -2.68946873 | -1.04830329 | C  | -2.57981421 | -2.59297724 | -2.84145257 |
| Fe | 2.39517869  | -2.62840126 | 1.37303034  | C  | -1.18601771 | -2.30023763 | -2.76812249 |
| C  | 1.49938573  | -2.07643893 | 3.16619876  | C  | -0.49813231 | -3.21460646 | -3.61769801 |
| C  | 0.86860404  | -3.24675443 | 2.65023507  | C  | -1.46895111 | -4.06065028 | -4.22229846 |
| C  | 1.85961177  | -4.26335226 | 2.52586550  | C  | -2.75310647 | -3.67872324 | -3.74087559 |
| C  | 3.09589917  | -3.72263519 | 2.97646459  | H  | -3.36969782 | -2.10053265 | -2.29777884 |
| C  | 2.87389757  | -2.37226684 | 3.36878057  | H  | -0.72465938 | -1.50763349 | -2.20285250 |
| H  | 1.03208108  | -1.12293764 | 3.35183431  | H  | 0.56974436  | -3.26809427 | -3.75633725 |
| H  | -0.17798521 | -3.36625952 | 2.42446422  | H  | -1.26433468 | -4.88084340 | -4.89097716 |
| H  | 1.70159510  | -5.25633327 | 2.13668455  | H  | -3.68720408 | -4.16345555 | -3.97125935 |
| H  | 4.04634648  | -4.23093019 | 2.97507761  | O  | 4.31192510  | 1.81832034  | 0.59176322  |
| H  | 3.62529087  | -1.67739850 | 3.70515319  | S  | 4.30756233  | 2.67243370  | 1.80270180  |
| Hg | -1.33791725 | -1.41723581 | 0.62512973  | O  | 3.09679348  | 3.47373446  | 1.91290380  |
| N  | -2.62278503 | -2.89548608 | 1.21948484  | O  | 5.56575269  | 3.28846290  | 2.12110958  |
| C  | -2.95785296 | -4.06442994 | 0.62989044  | C  | 4.04871007  | 1.37669678  | 3.12931159  |

|   |             |             |             |   |             |             |             |
|---|-------------|-------------|-------------|---|-------------|-------------|-------------|
| F | 3.99572113  | 1.90685369  | 4.35292683  | O | -7.77259420 | -6.66234337 | -1.14291832 |
| F | 5.01411820  | 0.44022228  | 3.11540334  | C | -6.18268309 | -4.83438641 | -2.19339218 |
| F | 2.87072840  | 0.72352658  | 2.91427056  | C | -7.16195719 | -4.17729353 | -2.81817983 |
| O | -5.52285881 | -6.33763688 | -0.19130946 | F | -5.60594745 | -5.67159728 | -3.07409914 |
| S | -6.78887382 | -5.73063453 | -0.66528737 | F | -5.23182018 | -3.91999723 | -1.84659697 |
| O | -7.22986373 | -4.63217703 | 0.18271476  |   |             |             |             |

Complex  $4_2 \cdot \text{Hg}(\text{TfO})_2$  <sup>no-interp.</sup> ( $qC_2$ ) E = -7119.81001123 au (RIJCOSX-B3LYP/def2-TZVP-f)

|    |             |             |             |    |             |             |             |
|----|-------------|-------------|-------------|----|-------------|-------------|-------------|
| N  | 0.00000000  | 0.00000000  | 0.00000000  | C  | -4.61266965 | -3.52006935 | 2.00839880  |
| C  | 1.34621961  | 0.00000000  | 0.00000000  | C  | -3.64023806 | -2.54676537 | 2.08788252  |
| N  | 1.79110177  | 1.26469988  | 0.00000000  | H  | -4.65992125 | -5.28944903 | 0.73411567  |
| C  | 0.71003644  | 2.12183101  | 0.03646384  | C  | -3.82142301 | -1.35769644 | 2.81833793  |
| C  | -0.40639084 | 1.31477278  | 0.01901114  | C  | -5.09895509 | -1.19158019 | 3.43869248  |
| H  | 2.80508181  | 1.50974321  | 0.12919743  | C  | -6.06524568 | -2.24730737 | 3.38950002  |
| C  | -1.71035646 | 1.82083173  | 0.16065680  | C  | -5.84446215 | -3.40198448 | 2.69548410  |
| C  | -1.81992778 | 3.22943024  | 0.36909915  | H  | -7.00850413 | -2.07048333 | 3.88657244  |
| C  | -0.64812546 | 4.05172295  | 0.31998993  | H  | -6.60075708 | -4.16514448 | 2.59335201  |
| C  | 0.60325394  | 3.52849807  | 0.15639929  | N  | -2.86821352 | -0.42484579 | 2.85448734  |
| H  | -0.78921152 | 5.11261465  | 0.47366182  | C  | -3.16426711 | 0.72592733  | 3.45487308  |
| H  | 1.49100018  | 4.14085247  | 0.19770979  | C  | -4.48495129 | 0.93886531  | 3.99186763  |
| N  | -2.76006074 | 0.99779386  | 0.16932667  | N  | -5.40682961 | -0.02288541 | 4.00639252  |
| C  | -3.94905689 | 1.53013188  | 0.44055606  | C  | -2.18050623 | 1.78276747  | 3.54494539  |
| C  | -4.05401592 | 2.93366120  | 0.75204968  | C  | -0.83797696 | 1.59857374  | 3.17502938  |
| N  | -3.00827134 | 3.75658592  | 0.67676983  | C  | 0.06605034  | 2.63530437  | 3.25163263  |
| C  | -5.13421121 | 0.70168277  | 0.46584092  | C  | -0.35103000 | 3.89602519  | 3.69614740  |
| C  | -5.12754679 | -0.63683589 | 0.04074285  | C  | -1.65703831 | 4.09589507  | 4.08627060  |
| C  | -6.26606950 | -1.40899965 | 0.11246695  | C  | -2.58946085 | 3.04666899  | 4.03539574  |
| C  | -7.44997845 | -0.86122896 | 0.62237381  | C  | -3.93432639 | 3.23653867  | 4.49880480  |
| C  | -7.48884455 | 0.45747346  | 1.02067633  | C  | -4.83355378 | 2.22865500  | 4.50601591  |
| C  | -6.34395182 | 1.26677459  | 0.93608400  | H  | -0.51272051 | 0.62333650  | 2.84324495  |
| C  | -6.39269896 | 2.65458398  | 1.29858266  | H  | 1.09330995  | 2.49434723  | 2.95400934  |
| C  | -5.31303227 | 3.45939634  | 1.18670500  | H  | 0.36534097  | 4.70598570  | 3.73575145  |
| H  | -4.21628802 | -1.05427185 | -0.36022192 | H  | -1.98230290 | 5.06333597  | 4.44816869  |
| H  | -6.25499071 | -2.44130276 | -0.20303217 | H  | -4.20753089 | 4.21801520  | 4.86642808  |
| H  | -8.33189950 | -1.48440158 | 0.69340610  | H  | -5.84150820 | 2.35829096  | 4.87457482  |
| H  | -8.40562848 | 0.89102001  | 1.40047380  | C  | -2.13845205 | -4.75065694 | -0.31513115 |
| H  | -7.33577914 | 3.04965008  | 1.65585042  | C  | -0.70080555 | -4.74259671 | -0.35087912 |
| H  | -5.34951740 | 4.50950185  | 1.44175467  | C  | -0.29420932 | -5.63647868 | -1.37430705 |
| C  | 2.15619571  | -1.19150590 | -0.02674388 | C  | -1.46086191 | -6.19858645 | -1.96542297 |
| C  | 1.81256210  | -2.40088384 | -0.72329727 | C  | -2.60127317 | -5.66565699 | -1.31667664 |
| C  | 2.88177426  | -3.31521327 | -0.54600576 | H  | -0.04384590 | -4.20882318 | 0.31547944  |
| C  | 3.88090778  | -2.68422944 | 0.24860890  | H  | 0.72463406  | -5.88111204 | -1.62391071 |
| C  | 3.44864686  | -1.37287942 | 0.56636093  | H  | -1.47936739 | -6.94168462 | -2.74465206 |
| H  | 0.93353210  | -2.56352635 | -1.32364739 | H  | -3.62688644 | -5.92694701 | -1.50064764 |
| H  | 2.94393478  | -4.29819961 | -0.98184928 | Fe | -1.43141127 | -6.61659369 | 0.06797347  |
| H  | 4.83131577  | -3.10925415 | 0.52422877  | C  | -2.06382767 | -7.09018099 | 1.96374129  |
| H  | 3.99628864  | -0.62690107 | 1.11104080  | C  | -2.69021037 | -7.94269334 | 1.01113780  |
| Fe | 3.54045100  | -1.57300668 | -1.46784608 | C  | -1.66323037 | -8.65084331 | 0.32551872  |
| C  | 3.52377509  | 0.02521946  | -2.76421201 | C  | -0.40738116 | -8.23464946 | 0.85044298  |
| C  | 4.78185987  | -0.05896597 | -2.10517590 | C  | -0.65541901 | -7.26898436 | 1.86663578  |
| C  | 5.35099971  | -1.32454779 | -2.42145344 | H  | -2.56968629 | -6.38517498 | 2.60363940  |
| C  | 4.44517779  | -2.02112873 | -3.27010007 | H  | -3.74643891 | -7.98444182 | 0.79599775  |
| C  | 3.31335461  | -1.18485356 | -3.48341506 | H  | -1.81200208 | -9.34423740 | -0.48591153 |
| H  | 2.82655934  | 0.84386441  | -2.68369324 | H  | 0.56063120  | -8.56565327 | 0.45125307  |
| H  | 5.18762547  | 0.67543107  | -1.42779392 | H  | 0.09188042  | -6.73711419 | 2.43141922  |
| H  | 6.28335445  | -1.70825840 | -2.04193072 | O  | 4.32419797  | 1.71517305  | 0.68241424  |
| H  | 4.57586247  | -3.02022743 | -3.65190460 | S  | 4.24271762  | 2.53320817  | 1.91620094  |
| H  | 2.43701580  | -1.43770683 | -4.05778001 | O  | 3.06894544  | 3.39278555  | 1.92530538  |
| Hg | -1.32118187 | -1.42741984 | 0.62176127  | O  | 5.49164505  | 3.07421233  | 2.37014251  |
| N  | -2.61371349 | -2.88296901 | 1.23284172  | C  | 3.79086653  | 1.24202239  | 3.19066507  |
| C  | -2.95185690 | -4.04574283 | 0.64261562  | F  | 3.60855865  | 1.78403811  | 4.39520502  |
| N  | -4.13988891 | -4.45243351 | 1.11070312  | F  | 4.72915062  | 0.28971603  | 3.28668274  |

|   |             |             |             |
|---|-------------|-------------|-------------|
| F | 2.63042484  | 0.62572330  | 2.83773620  |
| O | -5.49316674 | -6.39864984 | -0.05429921 |
| S | -6.75623022 | -5.78873913 | -0.53874612 |
| O | -7.18067069 | -4.67347836 | 0.29313649  |
| O | -7.74553609 | -6.72744175 | -0.98434068 |
| C | -6.17502311 | -4.92431922 | -2.08730020 |
| F | -7.17143878 | -4.28484777 | -2.69811918 |
| F | -5.62060898 | -5.78277224 | -2.95522923 |
| F | -5.22508037 | -4.00404696 | -1.77013    |
